# Supplementary material
Source: PubMed Central journal article supplement (PMC2724114)
Supplement: 00255.2009_3.pdf [file 00255.2009_3.pdf]

1 **Supplemental information:**

2  
3 **METHODS**

4 *Repeat administration of NMU and NMS.* The effect of repeated administration of NMU and  
5 NMS (2 nmol per day per mouse) was examined with respect to food intake and metabolic  
6 output. During feeding experiments, mice received daily injections of NMU or NMS at ZT  
7 12 for 3 consecutive days. Food intake was monitored hourly for the first 4 hr post injection,  
8 as well as 12 hr and 24 hr post injection. In addition, daytime (ZT0-12) and night time  
9 (ZT12-24) food intake was also measured on the day following the last peptide injection  
10 (referred to as day 4).

11  
12 **Supplemental Figure 1. NMU and NMS alter feeding behaviour and metabolic**  
13 **rate.** NMU (*A*) and NMS (*B*) were administered (i.c.v.) to mice at the onset of the  
14 dark period (8-15 mice/group). A dose-dependent reduction in food intake was  
15 observed following administration of either NMU or NMS, which was most  
16 pronounced over the first 4 hr post injection. NMU and NMS (2 nmol) caused a  
17 significant reduction in body weight over 24 hr (*C*). Further,  $VO_2$  was increased  
18 significantly following administration of either NMU or NMS at ZT2 (*D-E*; 4-6  
19 mice/group). In contrast, when the peptides were administered at ZT12, during the  
20 normal nocturnal rise in  $VO_2$ , no further elevation was observed (*F-G*). A decrease  
21 was observed in respiratory quotient (RQ) over approximately 4 hr post injection,  
22 likely reflecting decreased food intake in these mice (*G*). \* =  $P < 0.05$ , \*\* =  $P < 0.01$ ,  
23 one-way ANOVA with Dunnet's *post hoc* test.

24  
25 **Supplemental Figure 2. Effects of repeated NMU or NMS administration.** Short-term  
26 anorexigenic effects of both NMU and NMS diminished upon repeated dosing (*A*). The  
27 peptide-induced reduction in feeding over 24 hour post injection was also lost by day 2 and 3  
28 of administration, primarily due to increased daytime feeding in these mice relative to  
29 vehicle-treated animals (*B*). Interestingly, 24-hour food intake was increased compared with  
30 vehicle-treated animals on day 3 and 4, a phenomenon which was especially pronounced in  
31 the NMS-treated mice. Body weight showed a similar trend to food intake. While a  
32 significant drop in body weight was observed in peptide-treated mice on day 1, by day 4  
33 NMU- and NMS-treated mice were significantly heavier than mice treated with vehicle (*C*).  
34  $n = 8$  mice/group. \*\* =  $P < 0.01$ , \* =  $P < 0.05$  one way ANOVA (repeated measures) with  
35 Bonferonni's *post hoc* test.
