# Supplementary material
Source: PubMed Central journal article supplement (PMC2724114)

# Supplemental Figure 1.

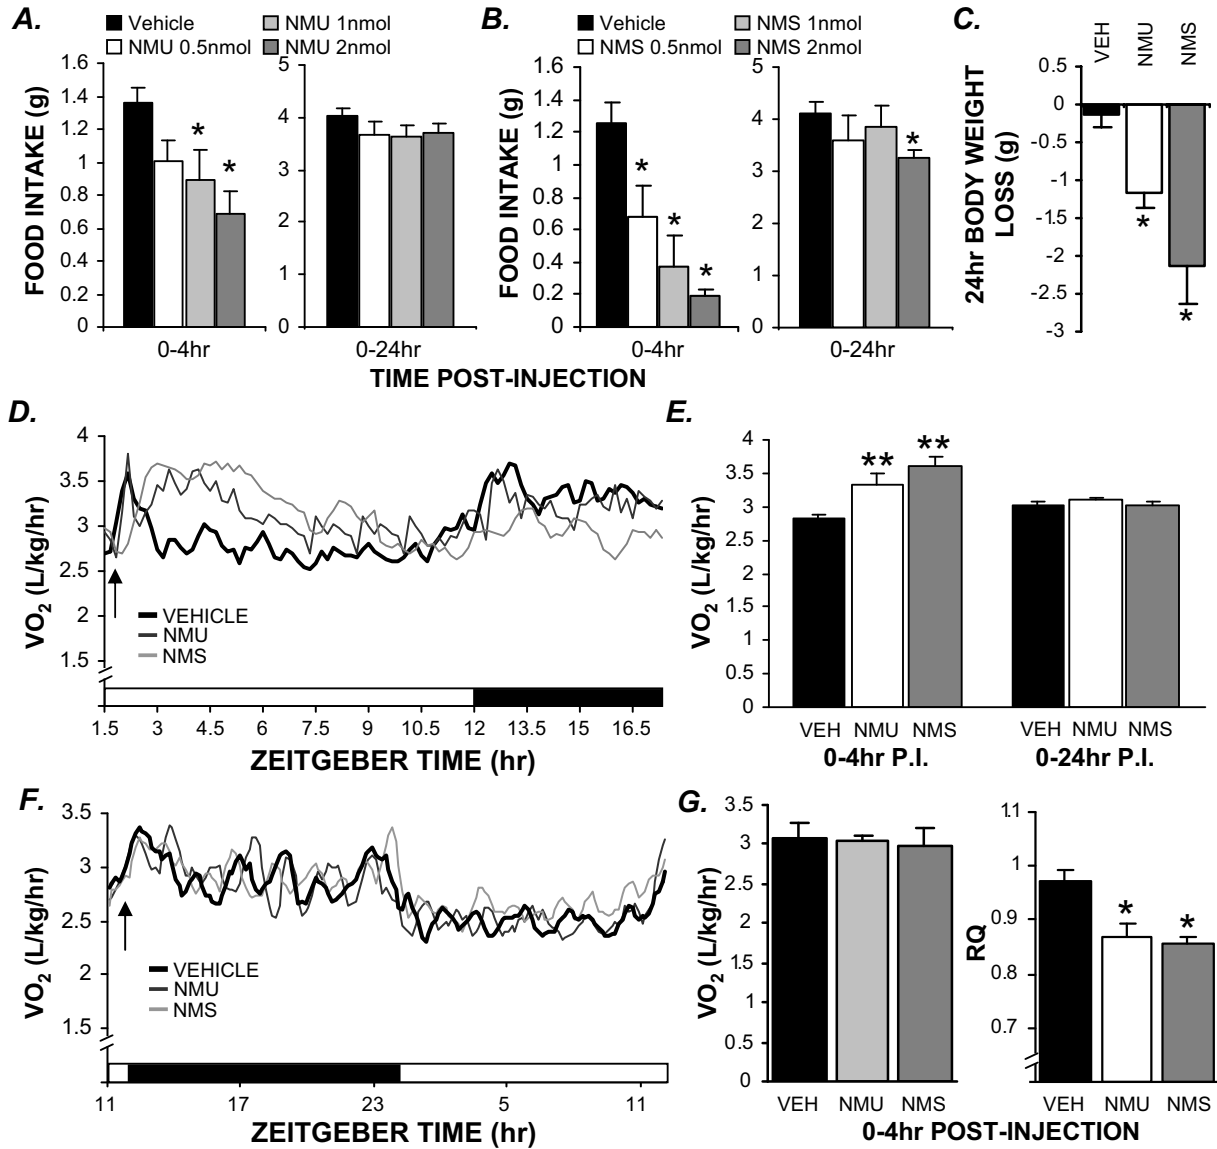

Supplement: 00255.2009_1.pdf [file 00255.2009_1.pdf]

# Supplemental Figure 2.

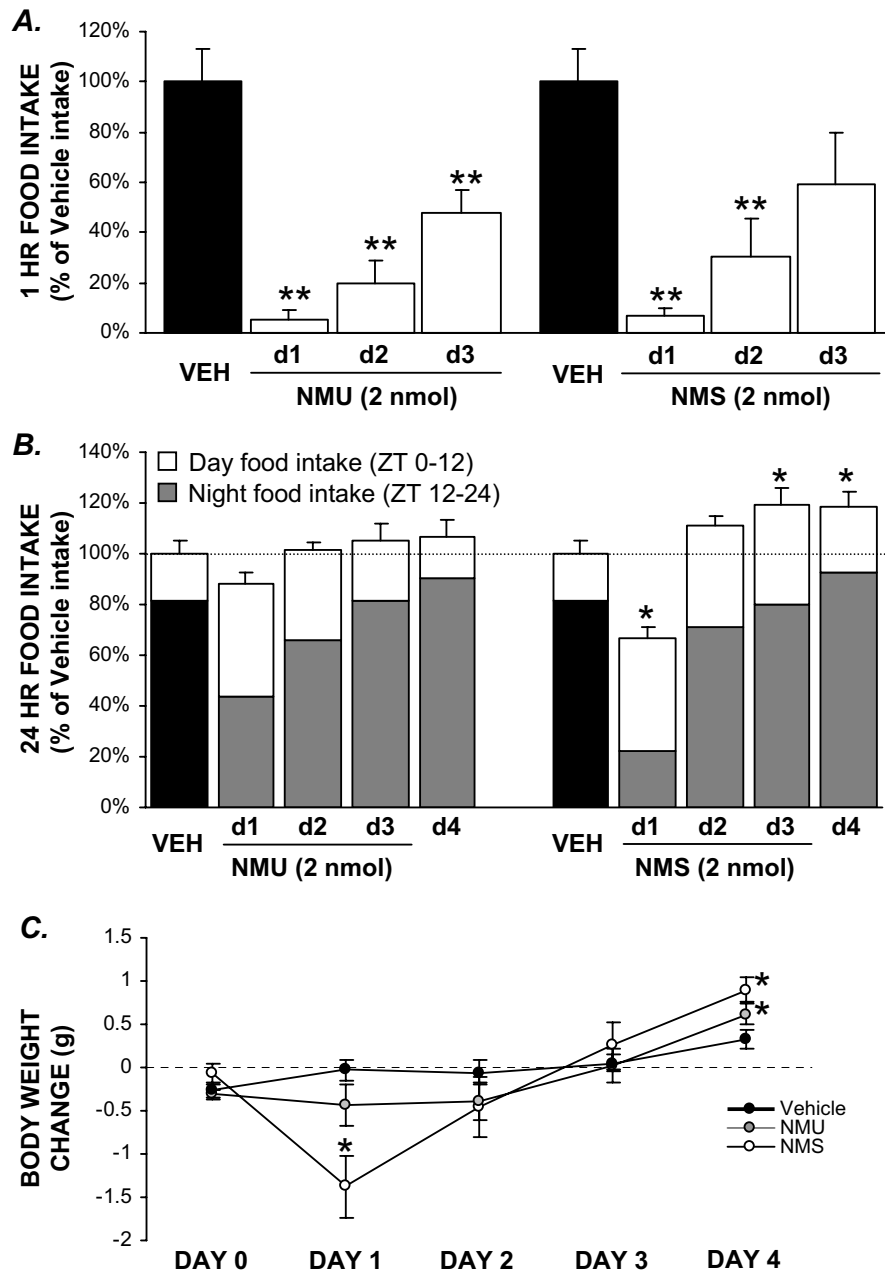

Supplement: 00255.2009_2.pdf [file 00255.2009_2.pdf]
